# Supplementary material for: The Role of C-O-H-F-Cl Fluids in the Making of Earth’s Continental Roots
Source: Research Square preprint supplement (doi:10.21203/rs.3.rs-5849744/v1), 2025-02-03
Supplement: Supplementary file 2 [file 18f1dad78fd628ae33ed5dc1.xlsx]

## Sheet: SIMS analyses & uncertainties
Olivine
Sample	Location	Ol_H2O (ppm)	Ol_H_error (ppm)	% Error	F	Error	% Error	Cl	Error	% Error		Opx_H2O (ppm)	Opx_H_error (ppm)	% Error	F	Error	% Error	Cl	Error	% Error		Cpx_H2O (ppm)	Cpx_H_error (ppm)	% Error	F	Error	% Error	Cl	Error	% Error
TM2A	Tariat, Mongolia											177.768	5.3452	3.00683	42.238	2.70201	6.3971	5.3363	2.50314	46.9078		177.768	5.3452	3.00655	42.238	2.70201	6.3534	5.3363	2.50314	47.711
TM2B	Tariat, Mongolia	2.5036	0.127784	5.05368	2.80623	0.542627	20.321	3.19573	1.99641	64.027		218.943	10.9857	5.01758	40.729	2.36804	5.81414	6.15167	2.55771	41.5776		218.943	10.9857	4.96956	40.729	2.36804	5.80996	6.15167	2.55771	58.8937
TM2C	Tariat, Mongolia	1.21679	0.0712554	5.83465	2.7448	0.577078	21.2337	3.3881	1.94116	61.177		102.556	4.44976	4.33885	15.8794	1.10342	6.94874	5.58965	1.30026	23.2619
TM2D	Tariat, Mongolia	1.29063	0.0691327	5.32051	2.84043	0.694192	24.3153	8.4191	3.44386	40.9817		51.7798	1.77155	3.42131	14.4276	1.01319	7.0226	2.52697	1.33448	52.8097		221.982	8.63068	3.88773	41.7511	2.24902	5.38896	6.06167	2.58789	43.1807
KH1A	Kilbourne Hole	0	0	8.63582	4.6917	0.941243	20.302	3.60287	2.26047	64.0863		310.358	9.83323	3.16835	86.5169	4.34545	5.02266	6.90013	2.84822	41.2778		310.358	9.83323	3.16773	86.5169	4.34545	5.0334	6.90013	2.84822	41.9903
KH1B	Kilbourne Hole	0	0	7.56267	4.5264	0.804194	17.7727	6.46253	2.68206	48.657		304.624	11.0342	3.62223	84.4574	3.77564	4.47047	6.4604	2.68421	41.5487		304.624	11.0342	3.62231	84.4574	3.77564	4.4675	6.4604	2.68421	48.2457
KH1C	Kilbourne Hole	0	0	7.88977	4.9231	0.800831	16.7977	6.683	2.83955	42.809		356.097	11.9753	3.36294	85.3892	4.25452	4.9825	9.01987	2.64482	29.3222		356.097	11.9753	3.365	85.3892	4.25452	4.97438	9.01987	2.64482	35.272
KH4E	Kilbourne Hole											447.229	16.0206	3.5822	39.1094	2.64945	6.77446	8.25377	3.15308	38.2018		447.229	16.0206	3.5758	39.1094	2.64945	6.78338	8.25377	3.15308	39.7123
KH4A	Kilbourne Hole	0	0	7.37995	2.9821	0.574923	19.1617	3.1035	1.94859	64.051		505.344	18.1911	3.59975	42.5335	2.54344	5.97985	8.0425	2.92392	36.3559		505.344	18.1911	3.56776	42.5335	2.54344	5.98291	8.0425	2.92392	37.3683
KH4B	Kilbourne Hole	0	0	6.25857	2.52607	0.485014	20.3293	2.97467	1.79562	71.569		244.517	7.25513	2.96712	15.1278	1.25126	8.27121	6.2571	1.96497	31.4039
KH4C	Kilbourne Hole	0	0	6.45513	2.4489	0.527976	22.9193	5.1469	2.36155	45.883		497.807	19.8848	3.99447	42.1061	2.09572	4.97722	8.4049	2.86122	34.0423		497.807	19.8848	3.96768	42.1061	2.09572	4.9841	8.4049	2.86122	34.0723
DW3A	West Eifel (Dresier Weiher)											387.278	14.1924	3.66466	33.1573	2.44496	7.37383	1.79745	1.4271	79.3959		387.278	14.1924	3.65305	33.1573	2.44496	7.25539	1.79745	1.4271	84.359
DW3B	West Eifel (Dresier Weiher)	0	0	6.22108	3.60183	0.765845	21.3453	4.14453	2.07819	54.3547		214.815	7.58089	3.52904	15.7464	1.46452	9.30062	9.05037	2.37862	26.282
DW3D	West Eifel (Dresier Weiher)	2.41475	0.138971	5.56622	4.1209	0.614981	14.9773	2.85647	1.78864	64.027		372.983	12.3333	3.30666	38.1955	2.20761	5.77977	5.7753	2.28096	39.4951		372.983	12.3333	3.30472	38.1955	2.20761	5.78192	5.7753	2.28096	40.2203
DW3E	West Eifel (Dresier Weiher)	0.991367	0.0564643	5.58698	4.5413	0.753477	16.8313	6.9389	2.57306	37.2415		375.021	12.9334	3.44872	35.6399	2.72128	7.6355	5.3366	2.40943	45.1491		375.021	12.9334	3.44756	35.6399	2.72128	7.56239	5.3366	2.40943	49.0887
G17A	West Eifel (Gees)	0	0	6.45241	4.14043	0.624628	15.0877	3.29167	1.882	61.177		224.325	10.2854	4.58505	5.98255	0.857795	14.3383	12.9737	4.60564	35.4999
G17B	West Eifel (Gees)	3.63113	0.261651	6.77972	4.02107	0.59094	15.526	2.89017	1.8131	64.0863		206.213	6.71411	3.25591	4.20022	0.759584	18.0844	18.489	5.64406	30.5266
G17D	West Eifel (Gees)	0	0	5.37595	2.58723	0.614993	24.2803	4.269	2.06779	54.2265		208.698	6.65027	3.18655	3.41634	0.536318	15.6986	8.04447	2.31279	28.7501
G17C	West Eifel (Gees)											433.203	13.3515	3.08205	64.9343	3.53419	5.44271	3.38447	1.87173	55.3036		433.203	13.3515	3.08215	64.9343	3.53419	5.43696	3.38447	1.87173	70.4317
G17E	West Eifel (Gees)											405.029	14.9881	3.7005	67.3314	3.25356	4.83216	3.77173	1.89801	50.3219		405.029	14.9881	3.69456	67.3314	3.25356	4.80891	3.77173	1.89801	54.2953
G17F	West Eifel (Gees)											427.342	13.606	3.18387	62.4773	2.96199	4.7409	2.9229	1.69728	58.0685		427.342	13.606	3.18074	62.4773	2.96199	4.72599	2.9229	1.69728	59.3487
sample	Location	Ol_H2O (ppm)	Ol_H_error (ppm)	% Error	F	Error	% Error	Cl	Error	% Error		Opx_H2O (ppm)	Opx_H_error (ppm)	% Error	F	Error	% Error	Cl	Error	% Error		Cpx_H2O (ppm)	Cpx_H_error (ppm)	% Error	F	Error	% Error	Cl	Error	% Error
BD1141A	Bultfontein	88	17	19.3182	122	23	18.8525					158.581	4.94619	3.11902	18.7045	5.07484	27.1317					298.526	20.8933	6.99882	21.027		8.23263	5.46655
BD1153A	Bultfontein	70	7	10	148	21	14.1892					241.088	7.48284	3.10378	27.6074	7.43709	26.9388
BD1153B	Bultfontein	79	5	6.32911	146	21	14.3836					425.485	13.1447	3.08935	26.66	7.18593	26.954
BD1153	Bultfontein	85	18	21.1765	194	26	13.4021					164.525	5.13149	3.11896	25.3965	6.85676	26.9988	2.35692	1.99175	84.5063								2.77
BD1153	Bultfontein	91	2	2.1978	168	18	10.7143
BD1152	Bultfontein	69	10	14.4928	42	13	30.9524					250.214	18.3095	7.31754	7.96452	1.17893	14.8023	1.18326	1.02474	86.603		370.859	25.9249	6.99051	14.7549		8.59761	5.38	0.531473	9.87868
BD1152	Bultfontein											217.774	15.9402	7.31959	8.99721	1.3164	14.6312					368.555	25.7622	6.99007	13.1337		8.77343	7.2597	3.18409	43.8598
BD1152	Bultfontein																					214.367	15.0128	7.00331	7.46671		10.1391
BD1672	Bultfontein	69	19	27.5362	62	16	25.8065					251.643	7.80816	3.10288	15.778	4.29658	27.2314					276.828	19.3863	7.00301	17.8221		8.90676	12.4504
BD1672	Bultfontein	69	19	27.5362	62	16	25.8065					255.55	7.92475	3.10106	13.3534	3.64504	27.2967					282.374	19.7721	7.00209	20.4651		8.49946	6.74949
BD1999A	Bultfontein											290.853	9.05845	3.11445	27.0708		16.4617					252.289	17.6757	7.00613	25.628		8.12589	6.26635	2.22941	35.5776
BD1999A	Bultfontein											177.269	5.55471	3.13349	17.7416		16.8834					207.323	14.5412	7.0138	23.8072		8.58115
BD1999A	Bultfontein											39.0363	1.26148	3.23156	12.71		17.8589	1.94746	2.59546	133.274		254.402	17.8302	7.00866	25.3375		8.45234	4.72968
BD1999B	Bultfontein											34.592	1.11995	3.2376	12.6563		17.8589	1.76881	1.39814	79.0442		278.797	19.5312	7.00553	27.419		8.17853	5.55697
BD1999B	Bultfontein																					296.055	20.7345	7.00361	27.0894		8.16524	9.57156
BD1999D	Bultfontein																					272.68	19.1104	7.00836	34.7753		7.86303	5.20717
BD1999C	Bultfontein																	2.86169				281.732	19.7415	7.00718	27.8905		8.34657
BD1999C	Bultfontein																					293.169	20.5347	7.00438	27.2832		8.20547
BD1999C	Bultfontein											249.219	18.2394	7.31863	17.765		13.8519					205.303	14.4002	7.01415	30.4751		8.00121
BD1999D	Bultfontein											260.579	19.0699	7.3183	15.693		14.0496					298.654	20.9198	7.0047	31.5195		7.95386
BD1999D	Bultfontein																								30.6693		8.07498
BD1999D	Bultfontein																					272.68	19.1104	7.00836	34.7753		7.86303
BD2125	Mothae	37	26	70.2703	120	26	21.6667															86.6372	6.08738	7.02628	30.4788		7.08417	5.38386
BD2125A	Mothae	92	13	14.1304	151	15	9.93377					153.703	4.82747	3.14079	23.6576	3.93496	16.633	1.40982	0.693209	49.1701		104.979	7.37195	7.02231	32.9534		7.01611
BD2125A	Mothae	92	13	14.1304	151	15	9.93377					209.93	6.56808	3.1287	27.6655	4.57172	16.525	2.01358	0.0402799	2.00042		68.2911	4.80294	7.03303	30.9269		7.15623	4.47939	0.169187	3.77702
BD2124	Mothae	93	2	2.15054	27	3	11.1111					91.4921	6.71285	7.33708	23.3361	3.13664	13.4412					62.6643	4.40578	7.03076	40.3715		6.38871
BD2124	Mothae	103	8	7.76699	8	5	62.5					155.282	11.3747	7.32518	25.1264	3.35371	13.3474	2.59285	0.861243	33.216		76.1424	5.34955	7.02572	42.3716		6.29968
BD2124	Mothae																					53.3785	3.75543	7.03548	41.0481		6.44383
BD2124	Mothae																					58.4633	4.11261	7.03451	33.1287		6.85835
BD2124	Mothae																					100.26	7.03973	7.02145	41.7812		6.48732	4.59902
BD2124	Mothae	110	2	1.81818	10	1	10					79.4657	5.83298	7.34025	20.8884	2.82815	13.5393					85.5382	6.00976	7.02582	37.8853		6.66094	4.35975
BD2126A	Mothae				26	6	23.0769					138.136	6.92469	5.01297	7.34004	0.795559	10.8386	1.66305	0.535347	32.1907								6.9353
BD2126B	Mothae				9	5	55.5556					132.527	6.64437	5.01361	16.9604	1.74985	10.3173	1.78714	0.816286	45.6755		120.891	8.48032	7.01486	34.2627		6.6742	2.47029
BD2126	Mothae	26	7	26.9231	6	2	33.3333					151.316	7.58274	5.01121	16.0999	1.67967	10.4328	1.56363	0.019796	1.26603		114.416	8.02817	7.01663	36.0601		6.6178	4.56922	2.24446	49.1214
BD2126	Mothae											166.658	8.34898	5.00965	12.5214	1.33659	10.6744					138.642	9.72045	7.01121	39.183		6.46889
BD2128A	Mothae	44	3	6.81818	49	23	46.9388					3.13839	0.15426	4.91524	16.5658	0.670151	4.04538											1.08
BD2128B	Mothae	23	9	39.1304	51	18	35.2941					3.15921	0.130182	4.12073	16.8371	0.710134	4.21769											2.82769
BD2128C	Mothae	30	22	73.3333	64	20	31.25
BD2128	Mothae	81	27	33.3333	33	7	21.2121					165.853	12.1479	7.32447	25.2591	3.3786	13.3758	1.7271	2.17679	126.038		144.116	10.1036	7.01071	41.2577		6.42627	1.95384	1.2358	63.2497
BD2128	Mothae	34	5	14.7059	36	7	19.4444					175.967	12.8869	7.32349	28.4768	3.77759	13.2655					122.634	8.60315	7.01529	31.7483		6.8531
BD2128	Mothae		7		90	22	24.4444					162.05	11.8691	7.32438	27.261	3.61725	13.269					136.599	9.57879	7.01233	31.66		6.84781
BD2133A	Mothae	8	4	50	56	14	25					181.419	5.65145	3.11514	13.1243	3.59262	27.3737	1.48952	1.018	68.344
BD2133A	Mothae											144.194	10.5653	7.32714	28.2334	3.74529	13.2655	1.60455	0.778832	48.5391
BD2133A	Mothae											121.173	8.88314	7.33099	28.1145	3.7335	13.2796	3.32503	1.85514	55.7933
BD2133A	Mothae											144.952	10.6213	7.32747	28.1179	3.738	13.294
BD2133B	Mothae				62	14	22.5806					189.097	5.90586	3.12319	14.6799	4.04067	27.5252	6.15685	4.6563	75.628
BD2133B	Mothae											186.428	5.79514	3.10852	10.4951	2.87341	27.3784
BD2135A	Mothae											18.3637		5.07985				1.35167	1.91155	141.421								2.51074	0.552592	22.0091
BD2135B	Mothae											47.2653	1.50484	3.18381	5.26177	1.47867	28.102
BD2135D	Mothae				18	14	77.7778					54.0359	1.71305	3.17021	5.10518	1.42776	27.9669
BD2133	Mothae		16		50	6	12
BD2133	Mothae	10	13	130	53	10	18.8679
BD2170	Mothae	50	36	72	63	16	25.3968					3.12727	0.210319	6.72533	16.3835	0.867425	5.29449	0.965283	1.36512	141.421
BD2170	Mothae	59	29	49.1525	45	15	33.3333					3.13828	0.170665	5.43818	16.4083	0.892793	5.44111	3.08371	0.0915159	2.96772
BD2170	Mothae	65	15	23.0769	50	12	24											3.57878	2.07159	57.8854
BD3028	Bultfontein	440	54	12.2727	9	2	22.2222					193.214	14.1464	7.3216	13.0926	1.84986	14.1291
BD3028	Bultfontein	593	427	72.0067	8	1	12.5					441.773	32.2989	7.31121	15.5038	2.16011	13.9328
BD3028	Bultfontein	37	50	135.135	31	4	12.9032					196.695	14.4025	7.32225	14.1693	2.002	14.1291
BD3028A	Bultfontein	223	12	5.38117	14	5	35.7143					209.823	6.52512	3.10982	15.684	4.27532	27.2592
BD3028A	Bultfontein	223	12	5.38117	14	5	35.7143					277.126	8.58837	3.09909	16.14	4.38896	27.1931
BD3067A	Bultfontein	25	10	40	32	12	37.5					5.25361		5.1006								153.783	10.8017	7.02398	28.8993		8.37621	16.7825
BD3067B	Bultfontein				11	4	36.3636					3.80189		5.10326								65.4781	4.61112	7.04222	33.1809		7.9539	9.04506
BD3067B	Bultfontein																					86.7949	6.1087	7.03809	14.2264		10.4617	13.8592
BD3067C	Bultfontein											42.6805		5.0576														6.55414
BD3670	Bultfontein		14		4	3	75					48.7312	3.58393	7.35449				1.35941	0.645183	47.4604
BD3670	Bultfontein		5			4						33.0648		5.06388				1.75496	0.000313686
BD3670	Bultfontein		2			5						35.9618		5.06237				1.8845
BD3676	Bultfontein	76	40	52.6316	120	16	13.3333					274.641	20.0949	7.3168	17.6863	2.44189	13.8066	1.3942	0.665723	47.7494
BD3676	Bultfontein	57	29	50.8772	107	18	16.8224					251.521	18.4067	7.31817	22.8741	3.09343	13.5237
BD3676	Bultfontein	56	20	35.7143	102	13	12.7451
BD730	Lashaine	36	11	30.5556	51.3	37	72.1248	26.6	25.1	94.3609		305	39	12.7869	22.5	5.4	24	23.2	35.3	152.155		201	73	36.3184	54.3	15	27.6243	12.1	3.7	30.5785
BD794	Lashaine	20	2	10	55.7	2.5	4.48833	2.4	2.1	87.5		208	10	4.80769	26.5	1.3	4.90566	0.8	0.8	100		255	47	18.4314	48.9	4.4	8.99796	7.2	6.6	91.6667
BD797	Lashaine	34	7	20.5882	105.1	5.7	5.42341	5.9	5.2	88.1356		219	45	20.5479	34.5	2	5.7971	3	1.4	46.6667

## Sheet: SIMS standards
standard_1	May_ol_H_Si	May_ol_F_Si	May_ol_H	May_ol_F
OPX-KH03-4-3.DAT	0.0112	4.92e-05	216	25
OPX-KH03-4-4.DAT	0.0113	4.33e-05	216	25
OPX-116610-3.DAT	0.00587	3.64e-05	128	17.4
OPX-116610-4.DAT	0.00598	3.13e-05	128	17.4
standard_2	Sept_ol_H_Si	Sept_ol_F_Si	Sept_ol_H	Sept_ol_F
AVL-519-4-15.DAT	0.00751	0.000326	1700	95
AVL-519-4-16.DAT	0.0075	0.00027	1700	95
Standard_3	Sept_cpx_H_Si	Sept_cpx_F_Si	Sept_cpx_H	Sept_cpx_F
CPX-KH03-4-1.DAT	0.000215746	4.04004e-06	427	64.8
CPX-KH03-4-2.DAT	0.000237527	3.67054e-06	427	64.8
CPX-SC-J1-1.DAT	1.35082e-05	1.93856e-06	62	26
CPX-SC-J1-2.DAT	1.66482e-05	1.86021e-06	62	26
CPX-SMC31139-1.DAT	-1.38726e-05	4.69359e-07	5	0.5
CPX-SMC31139-2.DAT	-2.30575e-05	4.25968e-07	5	0.5
OLV-116610-10-10.DAT	0	1.4987e-06	0
Standard_4	Sept_opx_H_Si	Sept_opx_F_Si	Sept_opx_H	Sept_opx_F
OPX-KH03-4-5.DAT	0.000228	1.21637e-06	216	25
OPX-KH03-4-6.DAT	0.000253	1.15765e-06	216	25
OPX-116610-10-5.DAT	0.000133	8.91336e-07	128	17.4
OPX-116610-10-6.DAT	0.000135	9.48831e-07	128	17.4
Standard_4	May_cpx_H_Si	May_cpx_F_Si	May_cpx_H	May_cpx_F
CPX-KH03-4-1.DAT	0.0139	0.000129	427	64.8
CPX-KH03-4-2.DAT	0.0116	0.000129	427	64.8
CPX-SCJ1-1.DAT	0.000876	5.66e-05	62	26
CPX-SCJ1-2.DAT	0.000954	5.31e-05	62	26
CPX-SMC31139-1.DAT	-0.000402	1.04e-06	5	0.5
CPX-SMC31139-2.DAT	-0.000509	5.23e-07	5	0.5
OL-116010-5_4.DAT	0	7e-06	0
