# Supplementary material for: The Role of C-O-H-F-Cl Fluids in the Making of Earth’s Continental Roots
Source: Research Square preprint supplement (doi:10.21203/rs.3.rs-5849744/v1), 2025-02-03
Supplement: Supplementary file 3 [file 757febd731956601ad25a80e.xlsx]

## Sheet: Modal min & volatile data
Sample	Location	Lithology	Modal amounts (%)							T °C	P GPa		Olivine chemistry					Orthopyroxene chemistry				Clinopyroxene chemistry				Bulk rock (calculated)					Data sources
			Ol	Opx	Cpx	Grt	Sp	Phl	Serpentine	(TA98)	(NG85)	Fo content	Ti (ug/g)**	H2O µg/g	H2O µg/g	F (ppm)	Cl (ug.g)	Ti (ug/g)**	H2O (ug/g)	F (ug/g)	Cl (ug.g)	Ti (ug/g)**	H2O (ug/g)	F (ug/g)	Cl (ug.g)	Ti (ug/g)	H2O (ug/g)	F (ug/g)	Cl (ug.g)	BulkMgO/SiO2
													LA-ICP-MS	SIMS	OL*	SIMS	SIMS	LA-ICP-MS	SIMS	SIMS	SIMS	LA-ICP-MS	SIMS	SIMS	SIMS
BD1999	Bultfontein	Opx-rich harzburgite	55.71	36.8	0.97	5.4		1.2		1009	4.29	92.6	20	na				63	260.375	21.5069	bdl	129	275	29	6.3	57.3				0.902014	This work, Jackson & Gibson (2023)
BD2125	Mothae	Opx-rich harzburgite	52	38.8	0.2	9.2		0.2		1057	4.42	93	190.48	37		120	bdl	72	164.029	22.8377	2	125	95	29.5	5.4	138.7	83.0732	71.32	0.7868	0.887391	This work, Jackson & Gibson (2023)
BD1152	Bultfontein	Opx-rich harzburgite	63.36	29.6	1.11	5.9				1016	4.38	91.9	5	69		42	bdl	19	236.118	8.12311	bdl	31	302.5	12	5.4	14.5	116.967	29.1488	0.05994	0.938725	This work, Jackson & Gibson (2023)
BD1672	Bultfontein	Opx-rich harzburgite	61.19	31.5	1.31	6				1052	4.41	91.8	14	69		62	bdl	71	253.596	14.5657	bdl	105	285	22.5	7.3	51.2	125.837	42.8207	0.09563	0.924796	This work, Jackson & Gibson (2023)
BD1153	Bultfontein	Dunite	91.83	6.1	1.78		0.3			996	3.92	94.8	172	88		181	bdl	798	237.846	26.1121	2	2243	195		2.8	228.5	98.79	167.805	0.17184	1.17655	This work, Jackson & Gibson (2023)
BD2126	Mothae	Garnet lherzolite	66.9	13.6	8.05	11.5				1273	5.06	92.4	2.3	13		3	bdl	207	144.043	20.7839	2	347	133.5	31.5	4.5	215.6	39.0335	7.36936	0.63425	0.933467	This work, Jackson & Gibson (2023)
BD2128	Mothae	Garnet lherzolite	75.17	15.9	2.86	6.1				1260	5.12	92.1	50	38		53	bdl	218	191.08	21.7329	bdl	616	138	37.5	2	223.2	62.8931	44.3681	0.0572	1.00676	This work, Jackson & Gibson (2023)
BD2135	Mothae	Opx-rich Sp harzburgite	71.05	27.1	1.28		0.6			806ⴕ	31.2ⴕ	94.2	2	bdl		0	bdl	154	82.9421	7.00551	2	358	78	16.5	2.5	50.2		2.10969	0.574	1.01804	This work, Jackson & Gibson (2023)
BD1140	Bultfontein	Opx-poor gt harzburgite	80.2	5.1	4.2	10.5				859	3.55	91.8	57	na				182	177.557	7.98721	2	573	280	24	3	111.2				1.05169	This work, Jackson & Gibson (2023)
BD730	Lashaine	Garnet lherzolite	64.4	21.5	5.6	8.5				1011	3.8	91.09		36	33.55	22.5	26.6		305	51.3	5.1		201	54.3	12.1		100.015	28.5603	18.9045	0.949741	This work, Gibson et al. (2024)
BD738	Lashaine	Garnet lherzolite	72	12.9	5.4	8.2		1.4		1055	4	92.02		20	22.88	34.5			208	105.1			255				55.002	38.3979		0.986832	This work, Gibson et al. (2024)
BD797	Lashaine	Garnet harzburgite	64.4	28.9		4.9	0.4					92.48		34	24.09	26.5	5.9		219	55.7	3			48.9			85.187	33.1633	4.6666	0.984444	This work, Gibson et al. (2024)
BP1	Western USA (Colorado Plateau)	Sp lherzolite	50.7	19.6	16		4		9.8			90.4		12	30.91	14.5	54.7		281	0.4	23.2	678	665	2.3	10.9		167.56	7.7979	34.0241		This work, Gibson et al. (2024)
TH17	Western USA (Colorado Plateau)	Garnet harzburgite	73.1	20.4	3.5	0.6		0.2		1176	4.1	89.74		29	29.7	65.8	17.1		270	53.9	4.2	4035	269	76.6	12.3		85.694	61.7764	13.7874	0.995363	This work, Gibson et al. (2024)
TH33	Western USA (Colorado Plateau)	Garnet harzburgite	75	21	2	1.8	0.2			Disequilibrium		91.36		26	28.38	17.6	2.5		258	25.9	2.2	648	322	49.4	34.3		80.12	19.627	3.023	1.01458	This work, Gibson et al. (2024)
KH4	Las Cruces (Kilbourne Hole)	Sp lherzolite	54	27.1	14.6		4.3			989	1.5*	89.26		4	24.97	2.6	1.6		227	15.1	5.9	4611	481	41.2	4.2		133.903	11.5113	3.0761	0.853993	This work, Gibson et al. (2024)
TM2	Khangai Rise (Tariat Depression)	Sp lherzolite	60.3	16.8	20.6		2.3			989	1.5*	89.47		8	9.02	2.8	3		82	16.3	4.2	440	212	41.6	3		62.272	12.9964	3.1326	0.864774	This work, Gibson et al. (2024)
DW3	West Eifel (Dresier Weiher)	Sp lherzolite	70.8	12.5	13.6		3.1			994	1.5*	91.69		7	22.88	4.1	2.4		208	16.7	11.1	479	379	35.6	2.2		82.5	9.8319	3.3859	1.01045	This work, Gibson et al. (2024)
G17	West Eifel (Gees)	Sp lherzolite	74.9	16.8	5.5		2.8			1122	1.5*	91.33		6	23.32	3.6	1.8		212	6.8	13.5	1917	421	64.9	1.7		63.265	7.4083	3.7097	1.02982	This work, Gibson et al. (2024)
KH3D	Las Cruces (Kilbourne Hole)	Sp lherzolite	70.6	23.5	5.2		0.7			1151	1.5*	90.92		11	20.68	9.3	2.8		188	23.4	1.6	836	284	44.7	3.9		66.714	14.3892	2.5556	1.00204	This work, Gibson et al. (2024)
TM4	Khangai Rise (Tariat Depression)	Sp lherzolite	56.4	23.9	13		6.7			861	1.5*	90.26		13	9.9	10.2	3.7		90	22.7	2.2	2618	164	67.5	4.6		50.162	19.9531	3.2106	0.902973	This work, Gibson et al. (2024)
MM8	West Eifel (Meerfelder Maar)	Sp harzburgite	77.8	20.8	0.6		0.9			1161	1.5*	91.43		3	28.38	11.2	4.8		258	30.2	4	1971	389	65.1	7.1		58.332	15.3858	4.609	1.06299	This work, Gibson et al. (2024)
* assumed pressure for garnet-free peridotites
ⴕSingle phase clinopyroxene thermometry (NT00) fitted to the Kaapvaal geotherm

## Sheet: Bulk trace element compositions
Bulk trace element compositions of Kaapvaal peridotites
Sample	BD1140	BD1141	BD1152	BD1153	BD1672	BD1999	BD2124	BD2125	BD2126	BD2128	BD2135
Location	Bult	Bult	Bult	Bult	Bult	Bult	Moth	Moth	Moth	Moth	Moth
Lithology	gthz	phllz	gthz	dun	gthz	gthz	gtlz	gthz	gtlz	gtlz	sphz
Li	1.4403	2.01135	1.14891	2.16809	1.2216	0.962177	0.148265	0.717682	0.242687	1.40587	0.893574			BD1999	57.3
Ba	0.193366	0.0270473	0.014541	0.084297	0.0114553	0.0128619	0.0489883	0.0741187	0.066007	0.0165438	0.016113			BD2125	138.7
Rb	0.002597	0.0010237		0.00150615	0.00180538		0.0028791	3.53e-05	0.0063785	0.00281511				BD1152	14.5
Th	0.0240034	0.0028188	0.00107679	0.0008124	0.0014706	0.00102397	0.00237027	0.00290435	0.00468795	0.00154158	0.031683			BD1672	51.2
U	0.00985687	0.00114647	0.00819681	0.0002658	0.00280016	0.002029	0.0020434	0.00467173	0.0031386	0.000935683	0.019926			BD1153	228.5
Nb	0.626814	0.292931	0.380784	0.120226	0.172566	0.396368	0.103169	0.157556	0.0931975	0.17021	0.01373			BD2126	215.6
Ta	0.00474513	0.00181733	0.00199271	0.000399	0.00250687	0.00281167	0.0107672	0.0046929	0.0071771	0.0027836	0.0002646			BD2128	223.2
La	0.713794	0.26158	0.049248	0.055086	0.0548383	0.0473557	0.123138	0.0147413	0.156298	0.0459808	1.55841			BD2135	50.2
Ce	2.98237	1.13525	0.314957	0.30165	0.276662	0.25024	0.558877	0.102075	0.510482	0.204952	4.36368			BD1140	111.2
Pb	0.185881	0.0421774	0.0231107	0.0163532	0.0135274	0.0197685	0.0273528	0.107868	0.0236015	0.0272645	0.181316
Pr	0.00649688	0	0.0228094	0	0.0126933	0.01725	0.0146619	0.0332005	0.0106329	0.00644567	0
Sr	21.0024	17.1949	6.53391	6.52563	4.8423	4.45557	9.09149	0.64552	5.18802	4.37568	11.0856
Nd	1.23209	0.901513	0.501603	0.26991	0.371667	0.432315	0.477699	0.337332	0.377376	0.234993	2.02209
Sm	0.175354	0.150027	0.130937	0.03819	0.149852	0.164603	0.154502	0.148992	0.113492	0.111949	0.30645
Zr	2.49758	1.15388	2.20845	0.721431	2.66766	2.92448	3.78478	5.55895	2.78156	2.69035	0.441323
Hf	0.0845031	0.0460133	0.0569922	0.029187	0.0421798	0.0520317	0.0850397	0.0838807	0.063082	0.0630432	0.010176
Ti	111.225	131.922	14.4875	228.543	51.1721	57.271	375.637	138.703	215.631	223.174	50.2356
Eu	0.0452533	0.0366947	0.0342226	0.008757	0.0472308	0.0455742	0.05431	0.0442178	0.037735	0.0349088	0.06732
Gd	0.129596	0.0709533	0.085775	0.021831	0.114178	0.100094	0.178729	0.156627	0.168483	0.137694	0.1656
Tb	0.0249891	0.00605133	0.00977538	0.0023661	0.010085	0.00920975	0.033833	0.0183902	0.031867	0.022537	0.016152
Dy	0.211873	0.0101113	0.0497327	0.009654	0.042332	0.0361811	0.222333	0.0787327	0.242969	0.146686	0.06738
Ho	0.0580396	0.00100727	0.00870668	0.0014136	0.00626981	0.00587989	0.0503257	0.00918413	0.056868	0.0297831	0.010185
Er	0.196599	0.002262	0.0236678	0.0027663	0.0171916	0.0179412	0.158174	0.017167	0.174204	0.0828572	0.024249
Tm	0.0342524	0.0001914	0.00389424	0.00028155	0.00277958	0.00311892	0.0229033	0.00218815	0.0294598	0.0137097	0.002943
Yb	0.268515	0.000783	0.0334153	0.0012324	0.0273332	0.0269188	0.181382	0.015828	0.213489	0.0937377	0.014745
Lu	0.0446439	9.57e-05		0.0001239		0.00504653	0.0248667	0.00368445	0.0338574	0.0139442	0.002277

## Sheet: Clinopyroxene
Clinopyroxene
Sample	BD1140	BD1141A	BD1152	BD1153	BD1672	BD1999	BD3067	BD2124	BD2125	BD2126	BD2128	BD2135
Location	Bult	Bult	Bult	Bult	Bult	Bult	Bult	Moth	Moth	Moth	Moth	Moth
Lithology	gt-hz	phl-lz	gt-hz	dun	gt-hz	gt-hz	wehr	gt-lz	gt-hz	gt-lz	gt-lz	sp-hz
EPMA
Na2O (wt.%)	1.0775	2.12557	1.35064	2.85537	1.63725	1.83721	1.18288	1.59397	1.5148	1.28674	1.3979	1.46395
SiO2	54.1829	54.7913	55.0914	55.2768	54.8265	54.9416	55.0987	55.0602	54.8873	54.9472	55.2273	54.6704
MgO	16.3005	15.371	17.0218	16.053	16.692	16.3438	16.4572	17.9334	16.8573	18.6015	18.4847	16.0985
Al2O3	1.8	2.52493	1.62293	2.0737	1.92805	1.86341	0.615267	2.15793	1.83073	1.882	1.83297	2.58618
CaO	21.6247	20.2853	20.8245	17.8055	19.8696	19.8316	22.0143	17.8021	20.3004	17.7832	18.0024	21.607
TiO2	0.1424	0.1078	0.00663333	0.386933	0.024	0.0265208	0.217667	0.159267	0.0280667	0.0764167	0.114867	0.0697333
FeO	2.5032	2.37867	2.13556	1.63343	2.31606	2.06618	2.8905	2.84407	1.84457	3.14753	2.81843	1.19288
Cr2O3	1.5401	1.78087	1.42772	3.87607	1.5481	2.14619	0.933444	1.20127	1.62097	0.916175	1.23667	1.65797
MnO	-	0.0871	0.0687	0.0510333	0.0934875	0.104383	0.0810917	0.106792	0.0842	0.112033	0.111092	0.0477333
NiO	-	-	-	-	0.0992	0.0909	-	0.0896667	-	0.12115	0.10925	-
Total	99.3012	99.4679	99.5584	100.012	98.9525	99.1801	99.5047	98.9127	99.0044	98.7907	99.2965	99.4031
Mg#	92.0679	92.0116	93.4242	94.5997	92.7778	93.3772	91.0301	91.8296	94.2161	91.3299	92.1199	96.0087
LA-ICP-MS
Li	0.812667	0.611	0.538083	0.6485	0.63125	0.513833	0.494667	0.7735	0.466	0.998111	0.696	0.1875
Ba	4.13333	0.466333	1.1905	4.68317	0.567333	0.281792	1.71411	0.940167	0.466333	0.751722	0.354167	0.895167
Rb	0.0618333	0.01765		0.083675	0.138875		0.160178	0.04095	0.01765	0.0686667	0.055625
Th	0.535333	0.0486	0.06485	0.0451333	0.0675333	0.0458167	0.0582222	0.0248333	0.0486	0.0280611	0.0235667	1.76017
U	0.103333	0.0197667	0.0234333	0.0147667	0.0171917	0.0115	0.0120444	0.008	0.0197667	0.00791111	0.00448333	1.107
Sc	24.2267	14.1367	13.78	19.7633	16.1892	16.7758	45.02	16.085	14.1367	12.7156	13.6433	56.2217
Ti	612.543	133.777	32.3775	1220.19	115.118	133.066	1103.15	929.488	133.777	368.336	662.53	384.36
V	482.12	184.75	275.995	260.192	307.997	292.127	323.216	254.343	184.75	199.672	199.92	222.28
Co	21.48	23.17	23	20.9833	25.0192	22.4058	20.0433	31.785	23.17	34.9178	31.4917	15.7517
Ni	405.04	471.373	447.033	402.443	495.416	440.448	238.461	558.908	471.373	602.412	564.117	288.668
Sr	497.657	296.463	589.413	362.535	368.054	440.484	178.518	180.978	296.463	63.5811	124.235	615.867
Y	1.98	0.381	0.212417	1.75633	0.335417	0.208333	5.00444	1.69167	0.381	1.25267	1.222	15.5783
Zr	48.16	14.8833	7.4275	29.5617	10.3975	11.7642	115.027	4.58833	14.8833	1.57333	3.35167	20.8517
Nb	1.47067	0.457667	0.515917	0.468	0.44125	0.552083	0.468778	0.536	0.457667	0.325667	0.242833	0.194333
La	16.8767	4.51	4.29083	3.06033	4.08833	4.45417	2.98667	2.4	4.51	1.88556	1.26767	86.5783
Ce	70.39	19.5733	24.5525	16.7583	19.1483	21.13	13.6533	10.34	19.5733	5.86667	5.33	242.427
Pr	8.11	3.33667	4.88167	3.22967	3.29	4.00583	2.41222	1.54217	3.33667	0.808556	0.8595	29.86
Nd	28.32	15.5433	22.0575	14.995	16.8	20.9475	12.9489	7.04333	15.5433	3.40333	4.56167	112.338
Sm	3.69	2.58667	2.41333	2.12167	2.91167	3.03833	3.43	1.27833	2.58667	0.633333	1.135	17.025
Eu	0.821	0.632667	0.3335	0.4865	0.6075	0.555417	1.09111	0.3635	0.632667	0.191	0.321167	3.74
Gd	1.83333	1.22333	0.628333	1.21283	1.03417	0.835417	2.71778	0.86	1.22333	0.534778	0.891667	9.2
Tb	0.188	0.104333	0.0254833	0.13145	0.0583333	0.043175	0.361222	0.0985	0.104333	0.0648889	0.074	0.897333
Dy	0.796667	0.174333	0.0729167	0.536333	0.144	0.0961111	1.62667	0.387667	0.174333	0.287889	0.374167	3.74333
Ho	0.108667	0.0173667	0.00878333	0.0785333	0.013575	0.0107889	0.239556	0.0640333	0.0173667	0.0495556	0.0527167	0.565833
Er	0.149667	0.039	0.0251167	0.153683	0.03525	0.0241167	0.423556	0.157833	0.039	0.116444	0.0935	1.34717
Tm	0.0072	0.0033	0.002525	0.0156417	0.00237778	0.00289167	0.0423889	0.0125667	0.0033	0.0158611	0.00711667	0.1635
Yb	0.038	0.0135	0.018025	0.0684667	0.0158889	0.0110792	0.163	0.0616667	0.0135	0.0801111	0.0476667	0.819167
Lu	0.00836667	0.00165		0.00688333		0.00125333	0.0188556	0.0122333	0.00165	0.0102389	0.007425	0.1265
Hf	1.80333	0.793333	0.471833	1.6215	0.4805	0.667167	6.85333	0.310833	0.793333	0.0882222	0.211167	0.565333
Ta	0.100667	0.0313333	0.0280417	0.0221667	0.0354	0.0375667	0.0227667	0.0331833	0.0313333	0.0193222	0.0201	0.0147
Pb	4.01	0.532333	0.814167	0.533667	0.697417	0.576167	0.363778	0.535667	0.532333	0.194833	0.2425	9.39833
